# Supplementary material for: Cooking African Pumpkin Leaves (Momordica balsamina L.) by Stir-Frying Improved Bioactivity and Bioaccessibility of Metabolites—Metabolomic and Chemometric Approaches
Source: MDPI journal article supplement (doi:10.3390/foods10112890), 2021-11-22
Supplement: s1 [file s1]

## Supplementary Material

# Cooking African Pumpkin Leaves (*Momordica balsamina* L.) by Stir-Frying Improved Bioactivity and Bioaccessibility of Metabolites—Metabolomic and Chemometric Approaches

Petunia Mashiane <sup>1,2</sup>, Vimbainashe E Manhivi <sup>2</sup>, Tinotenda Shoko <sup>2</sup>, Retha M Slabbert <sup>1</sup>, Yasmina Sultanbawa <sup>3</sup> and Dharini Sivakumar <sup>2,3,\*</sup>

<sup>1</sup> Department of Horticulture, Tshwane University of Technology, Pretoria P.O. 0001, South Africa; MashianeP@tut.ac.za (P.M.); SlabbertMM@tut.ac.za (R.M.S.)

<sup>2</sup> Phytochemical Food Network Research Group, Department of Crop Sciences, Tshwane University of Technology, Pretoria 0001, South Africa; ManhiviVE@tut.ac.za (V.E.M.); ShokoT@tut.ac.za (T.S.)

<sup>3</sup> Agricultural Research Council Industrial Transformation Training Centre for Uniquely Australian Foods, Queensland Alliance for Agriculture and Food Innovation, The University of Queensland, Brisbane, QLD, Australia; y.sultanbawa@uq.edu.au

\* Correspondence: SivakumarD@tut.ac.za

**Citation:** Mashiane, P.; Shoko, T.;

Slabbert, R.M.; Sultanbawa, Y.

Cooking African Pumpkin Leaves

(*Momordica balsamina* L.) by

Stir-Frying Improved Bioactivity

and Bioaccessibility of Metabolites—

Metabolomic and Chemometric

Approaches. *Foods* **2021**, *10*, 2890.

<https://doi.org/10.3390/foods10112890>

0

Academic Editor: Annalisa Tassoni

Received: 20 October 2021

Accepted: 17 November 2021

Published: 22 November 2021

**Publisher's Note:** MDPI stays neutral with regard to jurisdictional claims in published maps and institutional affiliations.

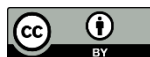

**Copyright:** © 2021 by the authors. Licensee MDPI, Basel, Switzerland.

This article is an open access article distributed under the terms and conditions of the Creative Commons Attribution (CC BY) license (<http://creativecommons.org/licenses/by/4.0/>).

**Table S1.** UPLC-QTOF/MS analyses of major metabolites detected in raw and cooked African leaves .

| Compound | RT(min) | [M-H] <sup>-</sup> | Formula                                         | Error (ppm) | MSE fragments                            | UV         | Tentative Identification                             |
|----------|---------|--------------------|-------------------------------------------------|-------------|------------------------------------------|------------|------------------------------------------------------|
| 1        | 7.09    | 205.03609          | C <sub>7</sub> H <sub>10</sub> O <sub>7</sub>   | -3.47       | 173.011                                  | 230        | Methylquinic acid                                    |
| 2        | 11.38   | 299.0764           | C <sub>13</sub> H <sub>16</sub> O <sub>8</sub>  | 2.82        | 137.024<br>93.034                        | 283        | Pseudolaroside A                                     |
| 3        | 12.44   | 325.0923           | C <sub>15</sub> H <sub>18</sub> O <sub>8</sub>  | 1.82        | 163.040                                  | 269        | β- D- glucosyl- 2-<br>coumarate<br>(Melilotoside)    |
| 4        | 14.00   | 353.05099          | C <sub>15</sub> H <sub>14</sub> O <sub>10</sub> | 1.23        | 191.020<br>173.009<br>135.099            | 326        | 4 caffeoylquinic acid<br>(Cryptochlorogenic<br>acid) |
| 5        | 16.27   | 337.05606          | C <sub>15</sub> H <sub>14</sub> O <sub>9</sub>  | 1.33        | 191.9496<br>173.9740<br>163.0427         | 312        | Cis 4-coumaroylquinic<br>acid                        |
| 6        | 16.98   | 337.04831          | C <sub>15</sub> H <sub>14</sub> O <sub>8</sub>  | -31.09      | 191.019<br>173.010<br>163.145            | 309        | Trans-4-<br>coumaroylquinic acid                     |
| 7        | 17.45   | 367.06699          | C <sub>16</sub> H <sub>16</sub> O <sub>10</sub> | 0.22        | 173.009                                  | 326        | 4 Feruloylquinic acid                                |
| 8        | 17.61   | 609.14404          | C <sub>27</sub> H <sub>30</sub> O <sub>16</sub> | 3.40        | 300.028<br>271.023<br>178.982<br>151.003 | 351        | Quercetin-3-rutinoside<br>(Rutin)                    |
| 9        | 17.90   | 367.06723          | C <sub>16</sub> H <sub>16</sub> O <sub>10</sub> | -0.42       | 173.009                                  | 326        | Feruloylisocitric acid<br>isomer                     |
| 10       | 18.19   | 463.08975          | C <sub>21</sub> H <sub>20</sub> O <sub>12</sub> | -3.34       | 300.029<br>271.026<br>179.009<br>151.005 | 265<br>346 | Quercetin 3-galactoside                              |
| 11       | 19.23   | 593.15198          | C <sub>27</sub> H <sub>30</sub> O <sub>15</sub> | -1.32       | 285.040<br>163.004                       | 253<br>352 | Kaempferol-O-<br>rutinoside (Nicotiflorin)           |
| 12       | 19.67   | 623.16125          | C <sub>28</sub> H <sub>32</sub> O <sub>16</sub> | 0.82        | 315.050<br>300.026                       | 230        | Isorhamnetin 3-O-<br>robinoside (Keioside)           |
| 13       | 20.39   | 477.09436          | C <sub>22</sub> H <sub>22</sub> O <sub>12</sub> | 19.89       | 314.041<br>300.039<br>285.053            | 230        | Rhamnetin-3-O-<br>glucoside                          |
| 14       | 20.68   | 429.17532          | C <sub>20</sub> H <sub>30</sub> O <sub>10</sub> | 3.04        | 325.1318<br>161.1176                     | 276        | Phenethyl rutinoside                                 |

DS\_TUT\_210514\_28

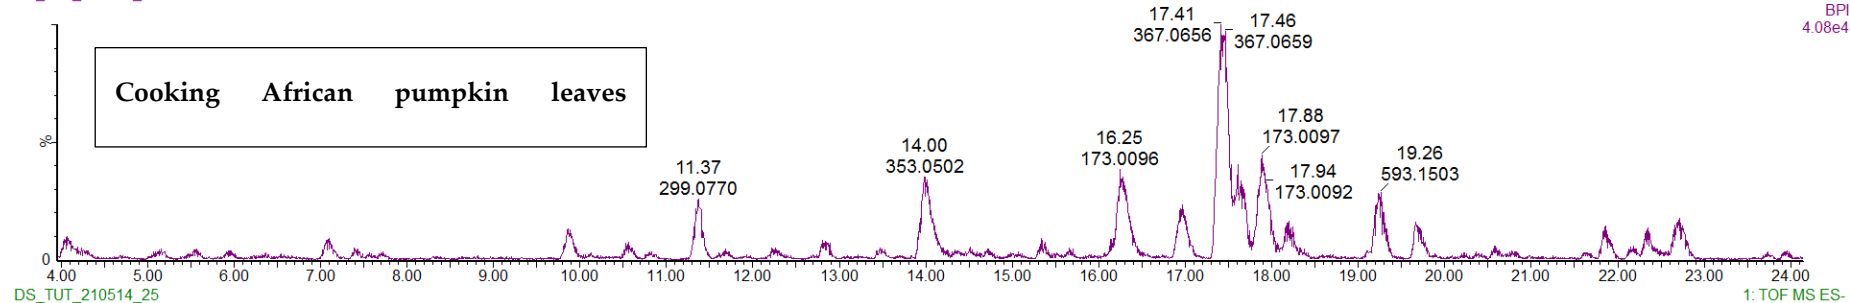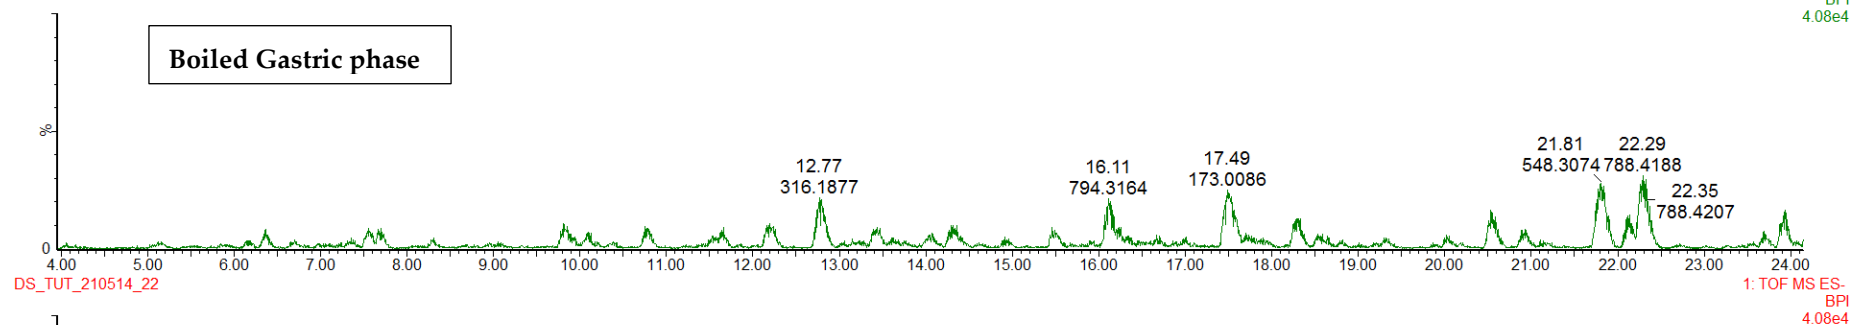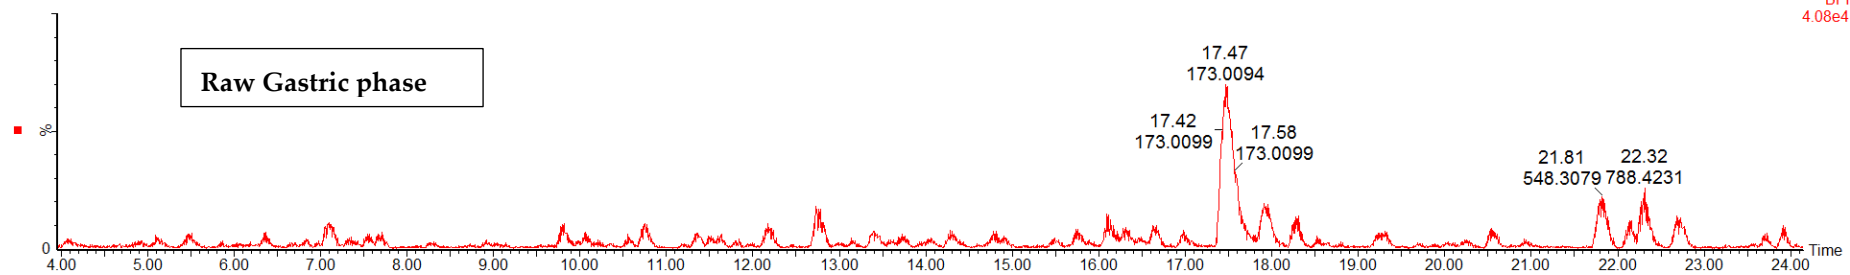

DS\_TUT\_210514\_37

1: TOF MS ES-  
BPI  
4.14e4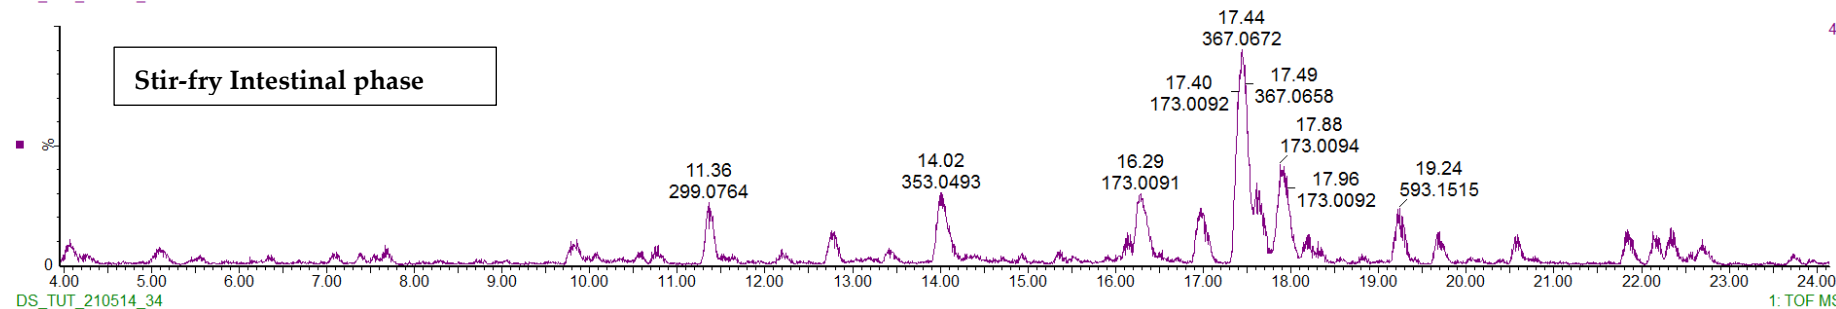

DS\_TUT\_210514\_34

1: TOF MS ES-  
BPI  
4.14e4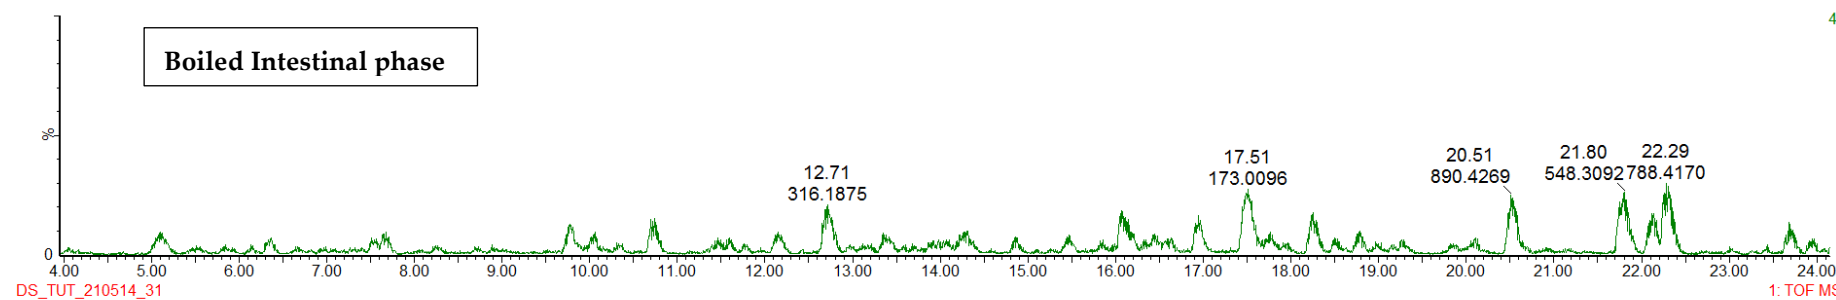

DS\_TUT\_210514\_31

1: TOF MS ES-  
BPI  
4.14e4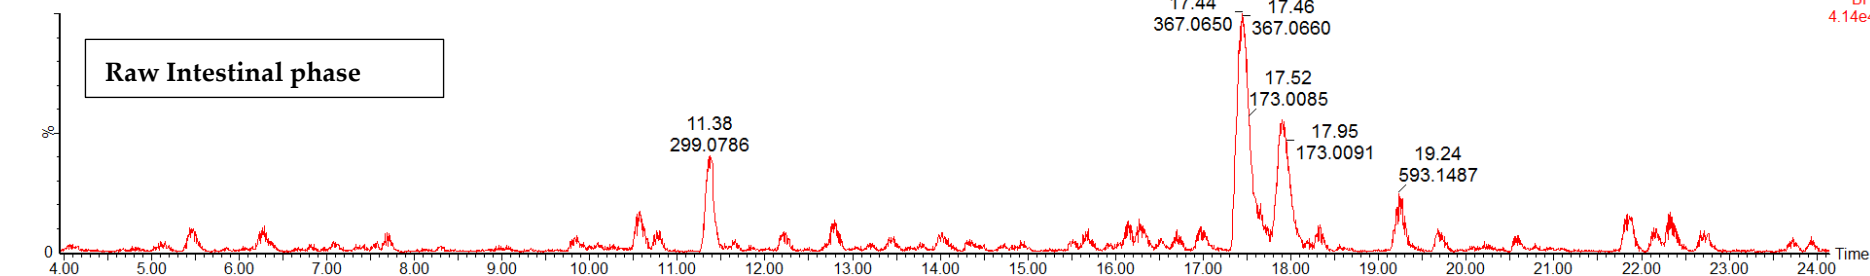

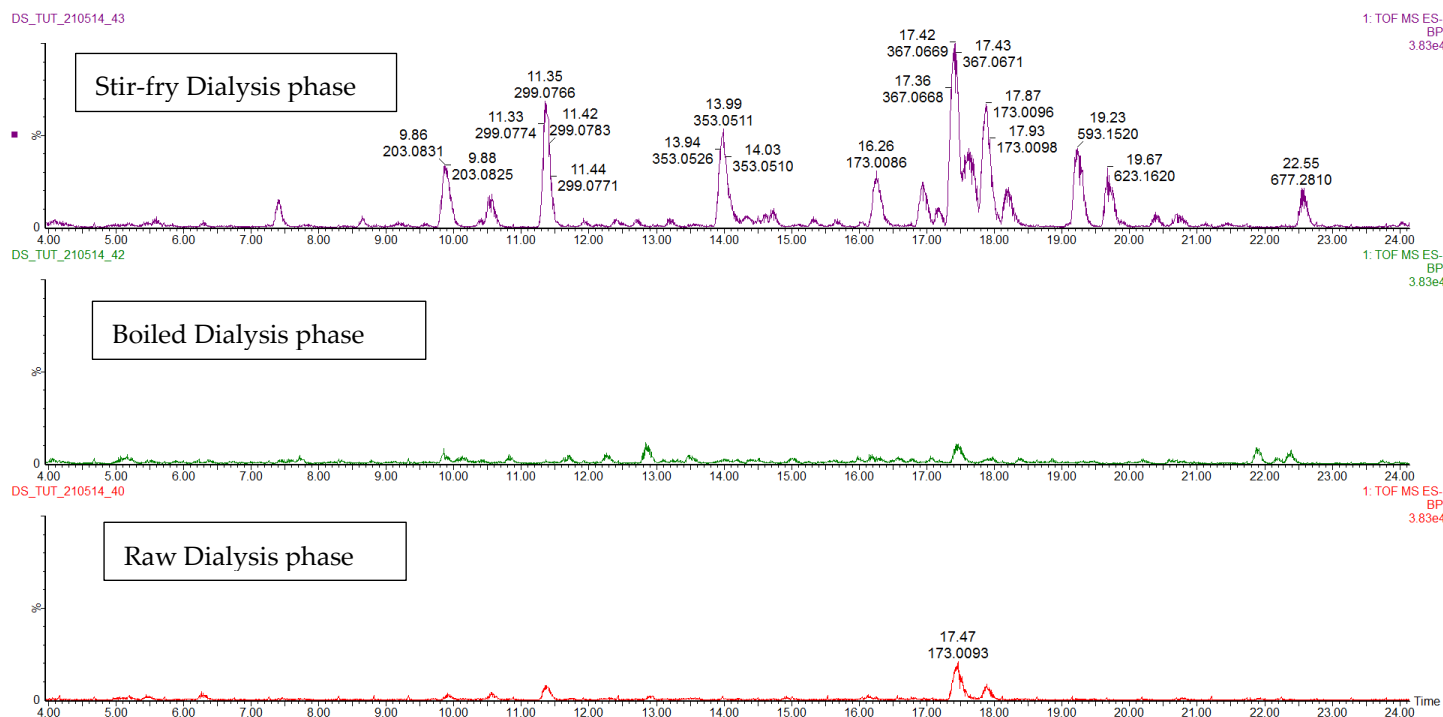

**Figure S1.** illustrating the increase of bioactive metabolites in the gastric, intestinal and dialysable digesta of stir-fried African pumpkin leaves compared to the boiled and raw leaves. .

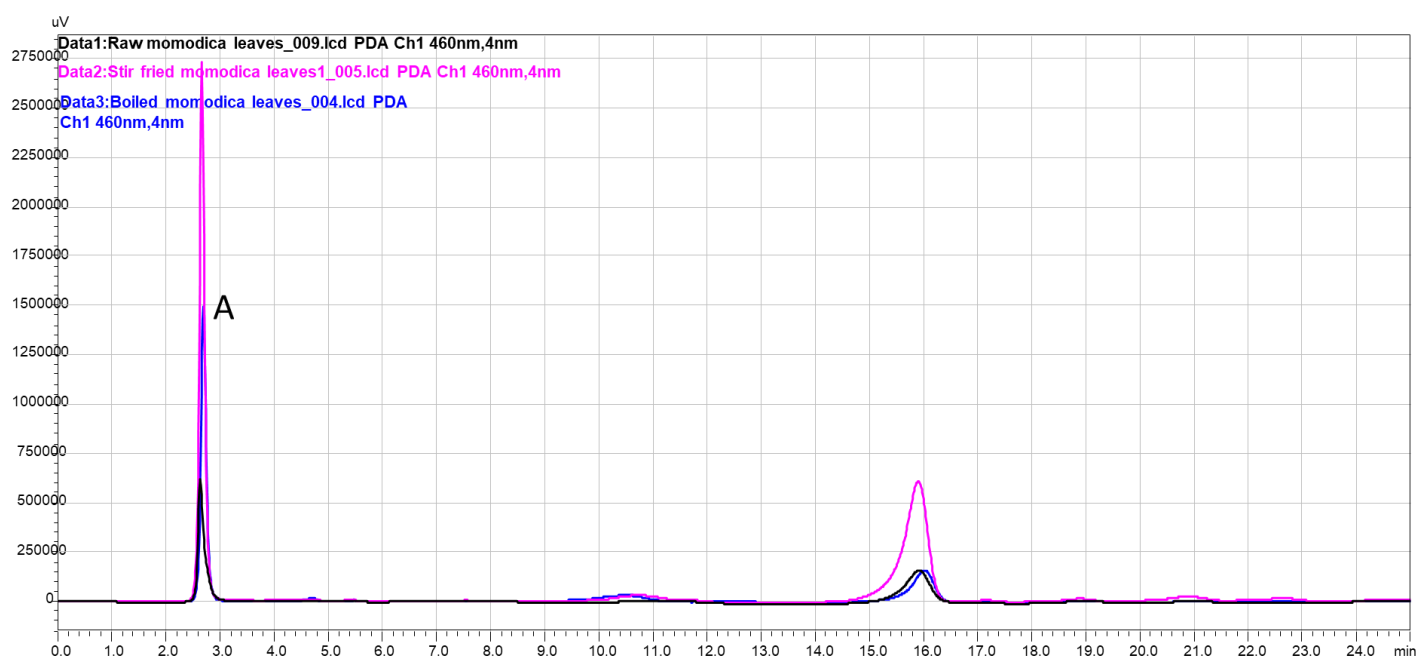

**Figure S2.** Showing stir fried African pumpkin (*Momordica balsamina* L.) leaves (pink) with the highest level of  $\beta$ -carotene (peak A), boiled African pumpkin leaves (blue) with a lower level of  $\beta$ -carotene, and raw leaves (black) with the lowest amount of  $\beta$ -carotene.
